# Supplementary material for: One-step preparation of bifunctionalized surfaces by bipolar electrografting
Source: Royal Society of Chemistry journal article supplement (doi:10.1039/c5ra20156j), 2015-12-18
Supplement: c5ra20156j1.pdf [file c5ra20156j1.pdf]

## Supplementary Information

# One-step Preparation of Bifunctionalized Surfaces by Bipolar Electrografting

Line Koefoed,<sup>a</sup> Kyoko Shimizu,<sup>a</sup> Steen Uttrup Pedersen,<sup>a</sup> Kim Daasbjerg,<sup>a,b</sup> Alexander Kuhn,<sup>c,d</sup> and  
Dodzi Zigah<sup>c,d</sup>

<sup>a</sup> *Department of Chemistry and Interdisciplinary Nanoscience Center, Aarhus University,  
Langelandsgade 140, 8000 Aarhus C, Denmark*

<sup>b</sup> *Carbon Dioxide Activation Center, Aarhus University, Gustav Wieds Vej 14, 8000 Aarhus C,  
Denmark*

<sup>c</sup> *Univ. Bordeaux, ISM, UMR 5255, F-33400 Talence, France*

<sup>d</sup> *CNRS, ISM, UMR 5255, F-33400 Talence, France*

## Cell Design

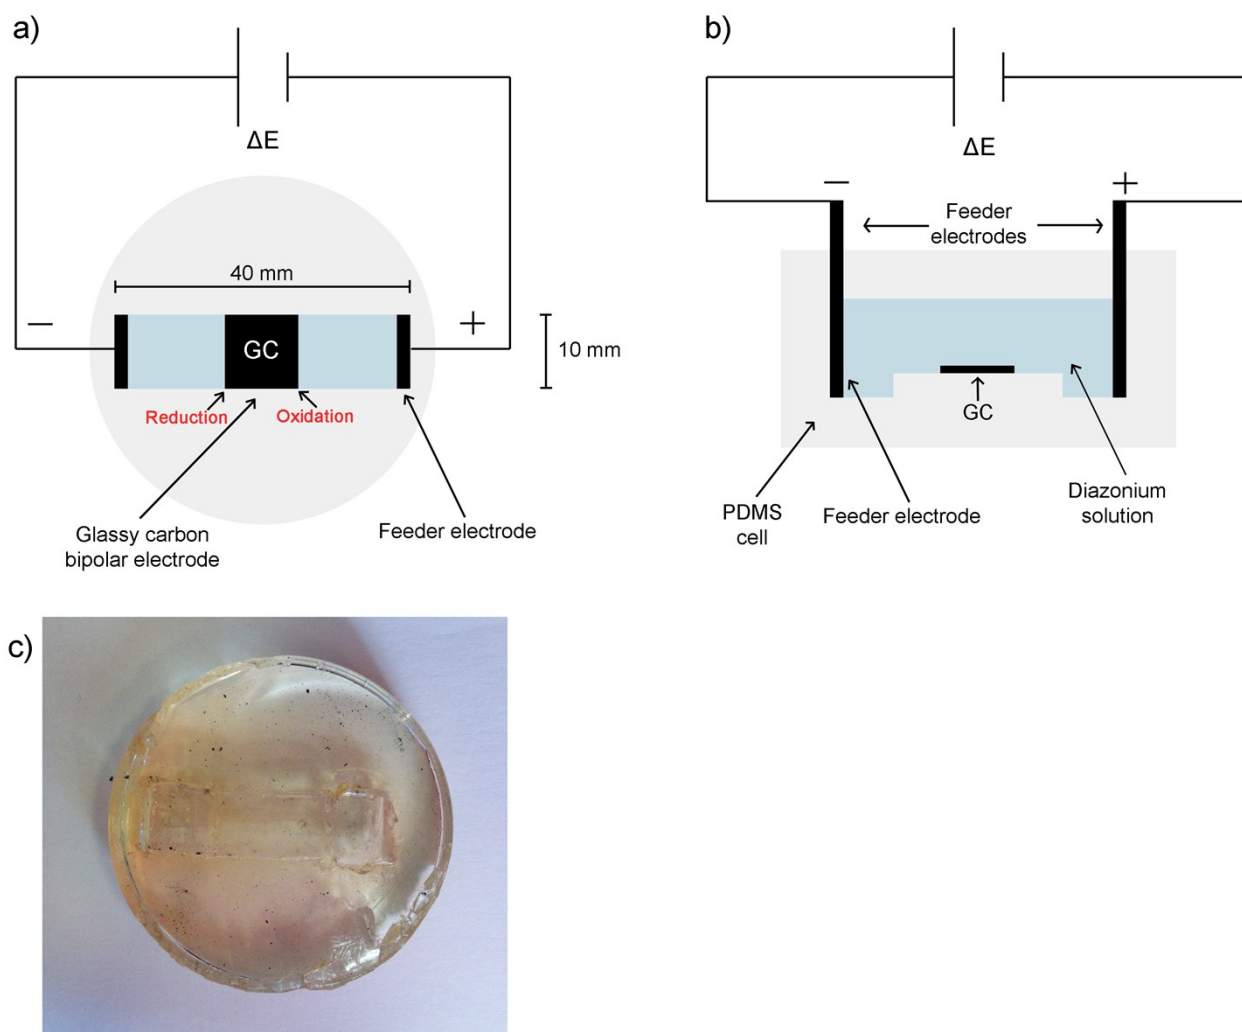

**Figure S1.** Illustration of the electrochemical cell used to perform bipolar grafting experiments: a) top view and b) side view. c) shows an optical image of the PDMS cell.

### **Poly(dimethylsiloxane) (PDMS) cell fabrication.**

We used the RTC615-kit from Momentive Performance Materials. The two components of the kit were mixed in a ratio 10:1 in mass then centrifuged for 5 min at 5000 rpm to remove air bubbles. Then the liquid was spread around a mold and rest overnight at 60°C. To finish the mold was removed and the desire shape had been obtained.

## Cyclic Voltammetry

For the cyclic voltammetric measurements a standard three-electrode setup (CH Instruments 601C) consisting of a GC disc electrode (diameter = 1 mm) as working electrode, a platinum wire as counter electrode and a Ag/AgI pseudo-reference electrode (i.e., a silver wire immersed in a CH<sub>3</sub>CN solution of 0.1 M Bu<sub>4</sub>NBF<sub>4</sub> and 0.01 M Bu<sub>4</sub>NI) in 10 mL degassed 0.1 M Bu<sub>4</sub>NBF<sub>4</sub>/CH<sub>3</sub>CN solution was employed. 4-(2-Aminoethyl)benzenediazonium tetrafluoroborate (11.8 mg, 0.05 mmol) or 4-(carboxymethyl)benzenediazonium tetrafluoroborate (0.025 g, 0.1 mmol) was added to the solution. A cyclic voltammogram was recorded at a sweep rate of 0.1 V s<sup>-1</sup> to determine the peak potential ( $E_p$ ) of the reduction and oxidation wave, respectively. The  $E_p$  values were referenced against SCE using a previous determination of  $E_{Fc^+/0}^0 = 0.41$  V vs. SCE in CH<sub>3</sub>CN.<sup>S1</sup>

*Reduction of 4-(2-aminoethyl)benzenediazonium tetrafluoroborate.* The first sweep shows a broad irreversible reduction wave with a peak potential at -0.56 V vs. SCE corresponding to the reduction of the aryldiazonium moiety (see Figure S2a). Two additional cyclic voltammograms were recorded showing the passivation of the electrode due to grafting.

*Oxidation of 4-(2-aminoethyl)benzenediazonium tetrafluoroborate.* The first sweep shows a small irreversible oxidation wave with a peak potential at 1.51 V vs. SCE corresponding to the oxidation of the amine functionality (see Figure S2b). Two additional cyclic voltammograms were recorded showing the passivation of the electrode due to grafting.

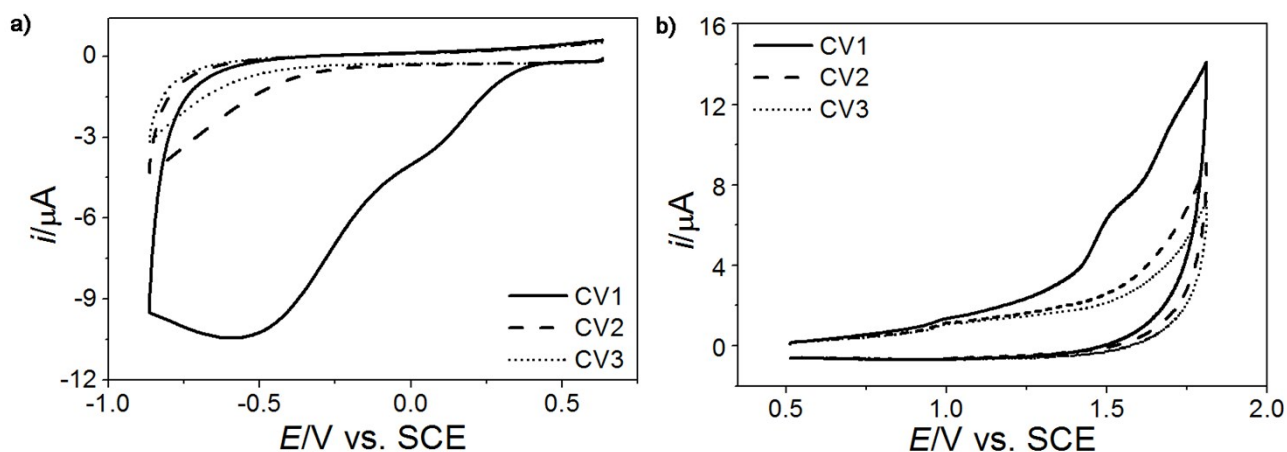

**Figure S2.** First, second, and third cyclic voltammograms recorded of 5 mM 4-(2-aminoethyl)benzenediazonium at a sweep rate of  $0.1 \text{ V s}^{-1}$  in  $0.1 \text{ M Bu}_4\text{NBF}_4/\text{CH}_3\text{CN}$  for the (a) reduction of the diazonium moiety and (b) oxidation of the amine functionality.

*Reduction of 4-(carboxymethyl)benzenediazonium tetrafluoroborate.* The first sweep shows a broad irreversible reduction wave with a peak potential at  $-0.29 \text{ V vs. SCE}$  corresponding to the reduction of the diazonium moiety (see Figure S3a). Two additional cyclic voltammograms were recorded showing the passivation of the electrode due to grafting.

*Oxidation of 4-(carboxymethyl)benzenediazonium tetrafluoroborate.* The first sweep shows a small irreversible oxidation wave with a peak potential at  $1.11 \text{ V vs. SCE}$  corresponding to the oxidation of the carboxymethyl functionality (see Figure S3b). Two additional cyclic voltammograms were recorded showing the passivation of the electrode due to grafting.

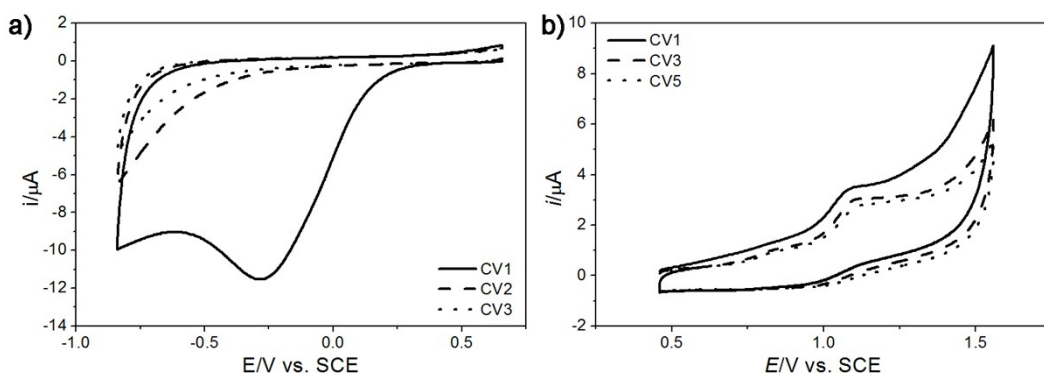

**Figure S3.** Cyclic voltammograms recorded of 10 mM 4-(carboxymethyl)benzenediazonium at a sweep rate of  $0.1 \text{ V s}^{-1}$  in  $0.1 \text{ M Bu}_4\text{NBF}_4/\text{CH}_3\text{CN}$  for the (a) reduction of the diazonium moiety (first, second, and third CV) and (b) oxidation of the carboxymethyl functionality (first, third, and fifth CV).

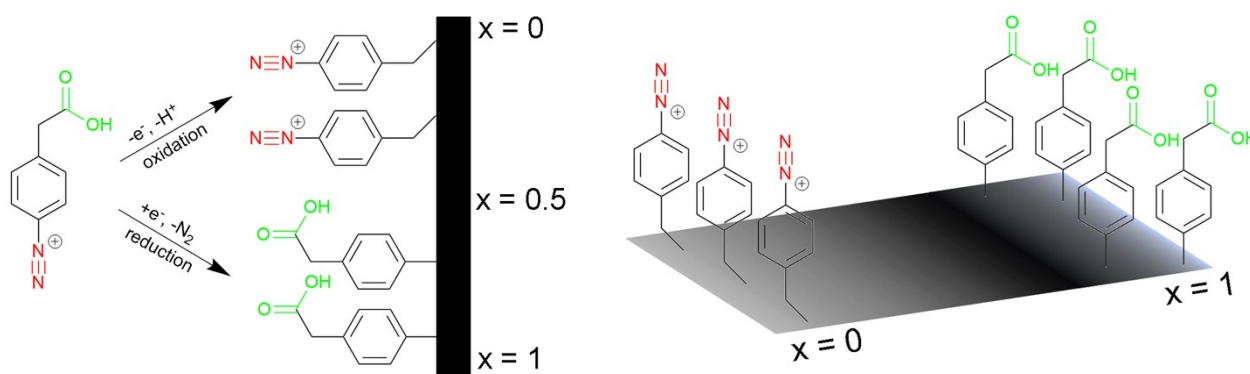

**Scheme S1.** Simultaneous grafting of two different organic films on glassy carbon using bipolar electrochemistry with 4-(carboxymethyl)benzenediazonium.

### XPS Spectra after Bipolar Grafting of 4-(Carboxymethyl)benzenediazonium

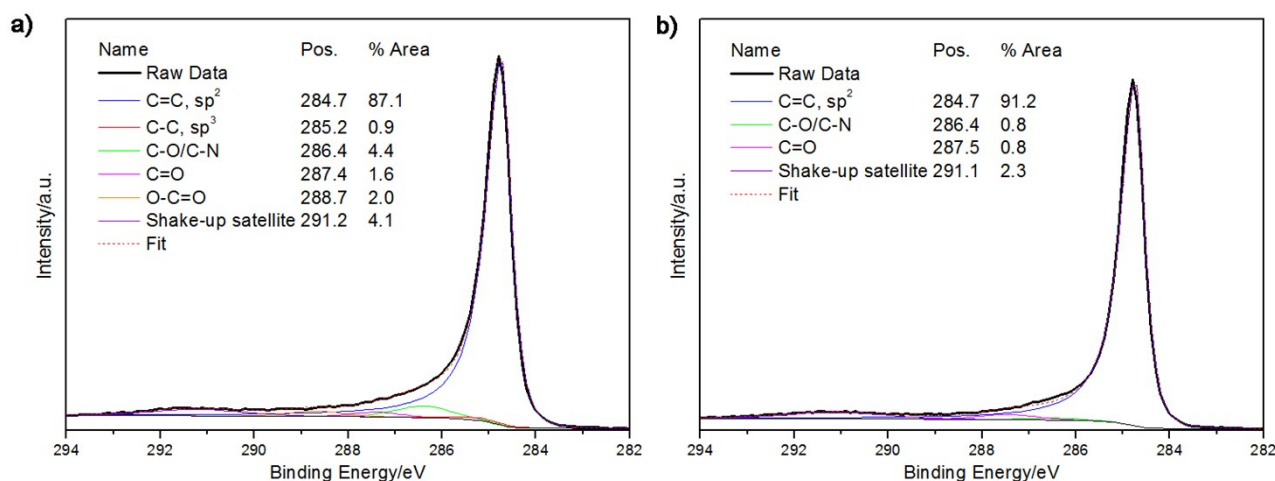

**Figure S4.** C 1s core level XPS spectra after bipolar grafting of 4-(carboxymethyl)benzenediazonium; a)  $x = 0$ , and b)  $x = 0.5$ . The spectra are fitted using an asymmetric peak shape for  $sp^2$ -hybridized C and symmetric peak shapes for the remaining of the contributions.

### References

- (S1) K. Daasbjerg, S. U. Pedersen and H. Lund, in *General Aspects of the Chemistry of Radicals*, ed. Z. B. Alfassi, Wiley, Chichester, U.K., 1999, 385-427.
